# Supplementary material
Source: PubMed Central journal article supplement (PMC6606459)
Supplement: rstb20190034supp3.pdf [file rstb20190034supp3.pdf]

Spicer & Morley:

Will giant polar amphipods be first to fare badly in an oxygen-poor ocean? Testing hypotheses linking oxygen to body size.

### Supplementary materials 3

#### Estimating dry body mass

---

The wet mass of 10 carefully blotted dry individuals of each species spanning a wide mass range, was measured using a precision semi-microbalance (Genius ME235S, Sartorius, Bradford, MA). They were then oven dried at  $T = 60\text{ }^{\circ}\text{C}$  to constant mass and reweighed using the same precision microbalance. There was a significant relationship between wet and dry mass detected for each of the three species ( $r^2 \geq 0.970$ ,  $P < 0.001$  in each case), with *S. gracilis* having a significantly different relationship from the other two species ( $F_{1,29} = 3.57$ ;  $P = 0.032$ ) The resultant equation for *S. gracilis* is  $y = 0.673x + 0.002$ , and for *P. brevicornis* and *P. miersii* is  $y = 0.2964x + 0.003$  where  $y$  = dry body mass (mg) and  $x$  = wet body mass (mg).
