# Supplementary material
Source: PubMed Central journal article supplement (PMC6606459)
Supplement: rstb20190034supp5.pdf [file rstb20190034supp5.pdf]

Spicer & Morley:

Will giant polar amphipods be first to fare badly in an oxygen-poor ocean? Testing hypotheses linking oxygen to body size.

## Supplementary materials 5.

Putative respiratory pigment in the haemolymph of *P. brevicornis*.

---

The absorbance peak detected at  $\lambda = 332$  nm in oxygenated, but not deoxygenated, hemolymph from *Prostebbingia brevicornis in vitro* we interpret as indicating the presence of hemocyanin (Hc), a respiratory pigment that reversibly and cooperatively binds oxygen, and is used in oxygen transport in this species, for the following reasons.

- (1) In all crustaceans examined to date oxygenated Hc is detected by an intense absorption peak at, or around,  $\lambda = 340$  nm [1,2,14]. This is close to the absorbance of the peak of  $\lambda = 332$  nm detected for hemolymph from *P. brevicornis*.
- (2) In all crustaceans examined to date, this oxygenated Hc peak disappears when haemolymph is deoxygenated [1,2] and the same happens in hemolymph from *P. brevicornis*.
- (3) Haemocyanin that binds oxygen reversibly and cooperatively has been found in the haemolymph of most gammaridean amphipods in which it has been sought [3-10] including giant amphipods in Lake Baikal [11], (exceptions being *Paraceradocus miersi* and *Shraderia gracilis* in this present study – see below for implications of this finding). Non gammaridean groups such as the cyamid whale lice possess haemoglobin and not Hc [12] and the planktonic hyperiids possess neither [13]. This makes our interpretations in points 1 and 2 more likely for *P. brevicornis*.
- (4) If we use the absorbance measures obtained at  $\lambda = 332$  nm, and assume that they are associated with the presence of a haemocyanin subunit of 74 kD in mass [3] we can use the extinction coefficients for Hc produced by Nickerson and Van Holde [14] ( $E^{1\%_{cm}} = 2.83$ , equating to  $E^{mmol.l^{-1}cm} = 17.26$  at  $\lambda = 340$  nm) to calculate putative Hc concentration. For *P. brevicornis* the calculated putative Hc concentration ranges between 0.33 and 0.39  $mmol.l^{-1}$  at the upper end of the range reported for other amphipod species, 0.14 – 0.41  $mmol.l^{-1}$  [3]. This congruence strengthens the suggestion that there is Hc in the hemolymph of *P. brevicornis*.

Taken together we have presented a number of different lines of evidence that there is a Hc in the hemolymph of *P. brevicornis*. However, a number of puzzles, incongruities and alternative explanations also exist which need to be aired. They are as follows.

Spicer & Morley:

Will giant polar amphipods be first to fare badly in an oxygen-poor ocean? Testing hypotheses linking oxygen to body size.

- (1) We have not directly measured oxygen-binding by the pigment, or isolated, identified, and verified the hemocyanin molecule itself. Even if there is oxygen binding present we have no evidence that it is cooperative.
- (2) While the congruence between the Hc values we might expect and what we estimate for *P. brevicornis* is good when using the extinction coefficient for the copper peak at 340 nm, the congruence is not so good when we measure the protein peak at 280 nm and assume that it is likely to be 60-95% Hc in line with other amphipods investigated [3]. In that case the protein concentration is always lower than the value calculated based on how much Hc there seems to be. In *P. brevicornis* brought back to the UK from the Antarctic the haemolymph protein levels can be very low even though the animals are well fed and have sufficient copper in their food (JIS, pers obs). Therefore we have been unable to substantiate the claim of Hc being present in the haemolymph by (i) measuring the oxygen content of the hemolymph or (ii) replicating the disappearance of any peak at  $\lambda = 332$  nm when the haemolymph is equilibrated with nitrogen gas.

Aside from oxygen transport, Hcs are also known to participate in homeostatic and physiological processes: moulting, hormone transport, osmoregulation and protein storage and as precursors of antimicrobial and antiviral peptides.

## References

- [1] Mangum CP 1997. Invertebrate blood oxygen carriers. *Handbook of Physiology, Section*, **13**, 1097-1131.
- [2] Giomi F, Beltramini M 2007. The molecular heterogeneity of hemocyanin: its role in the adaptive plasticity of Crustacea. *Gene* **398**, 192-201.
- [3] Spicer JI 1993. Oxygen binding by amphipod (Crustacea) haemocyanins. *Mar. Behav. Physiol.* **24**, 123-136.
- [4] Spicer JI, Taylor AC 1994. Oxygen-binding by haemocyanins from an ecological series of amphipod crustaceans. *Mar. Biol.* **120**, 231-237.
- [5] Maltby L 1995. Sensitivity of the crustaceans *Gammarus pulex* (L.) and *Asellus aquaticus* (L.) to short-term exposure to hypoxia and unionized ammonia: observations and possible mechanisms. *Water Res.* **29**, 781-787.
- [6] Spicer JI 1995. Ontogeny of respiratory function in crustaceans exhibiting either direct or indirect development. *J. Exp. Zool.* **272**, 413-418.
- [7] Sandberg-Kilpi E, Vismann B, Hagerman L 1999. Tolerance of the Baltic amphipod *Monoporeia affinis* to hypoxia, anoxia and hydrogen sulfide. *Ophelia* **50**, 61-68.
- [8] Hodgson E, Spicer JI 2001. Subunit compositions of crustacean haemocyanins are species-specific: evidence from non-decapod species. *Comp. Biochem. Physiol. A: Mol. Integr. Physiol.* **128**, 873-888.
- [9] Spicer JI, Hodgson E 2003. Structural basis for salinity-induced alteration in oxygen binding by haemocyanin from the estuarine amphipod *Chaetogammarus marinus* (L.). *Physiol. Biochem. Zool.* **76**, 843-849.
- [10] Hagner-Holler S, Kusche K, Hembach A, Burmester T 2005. Biochemical and molecular characterisation of hemocyanin from the amphipod *Gammarus roeseli*: complex pattern of hemocyanin subunit evolution in Crustacea. *J. Comp. Physiol. B*, **175**, 445-452.

Spicer & Morley:

Will giant polar amphipods be first to fare badly in an oxygen-poor ocean? Testing hypotheses linking oxygen to body size.

- [11] Bedulina DS, Gurkov AN, Baduev BK, Borvinskaya EV, Dimova MD, Timofeyev, MA 2016. Preliminary analysis of hemocyanins in hemolymph plasma of Baikal endemic amphipods. *J. Stress Physiol. Biochem.* **12**, 74-86.
- [12] Terwilliger NB 1991. Arthropod (*Cyamus scammoni*, Amphipoda) hemoglobin structure and function. In: Structure and Function of Invertebrate Oxygen Carriers (ed. S Vinogradov and O Kapp), pp. 59–63. Berlin, Heidelberg, New York: Springer Verlag.
- [13] Spicer JI, Morrill D 1995. Oxygen carriage by the haemolymph of hyperiid amphipods. *J. Mar. Biol. Assoc. UK* **75**, 997-998.
- [14] Nickerson KW, Van Holde KE 1971. A comparison of molluscan and arthropod hemocyanin-I. Circular dichroism and absorption spectra. *Comp. Biochem. Physiol.*: **39B**, 855-872.
